# Supplementary material
Source: PubMed Central journal article supplement (PMC6755726)
Supplement: JB.00433-19-s0001.pdf [file JB.00433-19-s0001.pdf]

**Supplementary material for:**

**Identification and characterization of genes required for 5-hydroxyuridine synthesis in *Bacillus subtilis* and *Escherichia coli* tRNA**

**Author:**

Charles T. Lauhon<sup>1,\*</sup>

**Affiliation:**

<sup>1</sup> Pharmaceutical Sciences Division, School of Pharmacy, University of Wisconsin, Madison, WI, 53705, USA

\* To whom correspondence should be addressed. Tel: 608-262-3083; Email:

[clauhon@wisc.edu](mailto:clauhon@wisc.edu)

**Table S1. List of primers used in this study. All sequences are written from 5' to 3' end.**

|              |                                          |
|--------------|------------------------------------------|
| YegQpBAD33.N | GCCGGTACCATGTTTAAACCGGAACCTCCTT          |
| YegQpBAD33.C | GCCAAGCTTTCACCTTACCGTGGGGATTACG          |
| HisYegQ.N    | CATCATCACCACCATCACTTTAAACCGGAACCTCCTTTCC |
| HisYegQ.C    | GTGGCGGCCGCTCTATTACTTACCGTGGGGATTACGCGT  |
| YhbUpBAD33.N | GCCGGTACCATGGAGCTGCTCTGCCCTGCC           |
| YhbUpBAD33.C | GCCAAGCTTTCACTGCCATTTACGGTGATA           |
| HisYhbU.N    | CATCATCACCACCATCACGAGCTGCTCTGCCCTGCCGGA  |
| HisYhbU.C    | GTGGCGGCCGCTCTATTACTGCCATTTACGGTGATATGC  |
| HisYhbV.N    | CATCATCACCACCATCACAAATATTCCTTAGGGCCAGTG  |
| HisYhbV.C    | GTGGCGGCCGCTCTATTAGGCTTGCAGCTCCAGTCCTGC  |
| HisRIhA.N    | CATCATCACCACCATCACACCGTATCTTCTCATCGACTT  |
| HisRIhA.C    | GTGGCGGCCGCTCTATTACCTTTTCGCTTCGGCAATGT   |
| pKD3cat.N    | GTGTAGGCTGGAGCTGCTTC                     |

|                           |                                                                   |
|---------------------------|-------------------------------------------------------------------|
| pKD3 <i>cat</i> .C        | ATGGGAATTAGCCATGGTCC                                              |
| pKD3 <i>cat</i> primer2.C | CATATGAATATCCTCCTTAG                                              |
| Deltayeg <i>Qcat</i> 40.N | AGGTGAAGCGGATCTGACCTGTCATCAGAACGAGAGAATTGTGT<br>AGGCTGGAGCTGCTTC  |
| Deltayeg <i>Qcat</i> 40.C | TTCTAAGAATTTTCCATCCGGGAAAAATAATCGAAATTAATGGGAATT<br>AGCCATGGTCC   |
| Deltayhb <i>Ucat</i> .N   | ACATTTTTGCGTTTTGATAGCGCAACCTTCAGGAAAATTGTGTAGGCTG<br>GAGCTGCTTC   |
| Deltayhb <i>Ucat</i> .C   | TACCACAGCACTGGCCCTAAGGAATATTTTCATTGCTTTTCATGGGAATTA<br>GCCATGGTCC |
| Deltayhb <i>Vcat</i> .N   | CTCTTGGCGCATATCACCGTAAATGGCAGTGAGAAAAGCAGTGTAGG<br>CTGGAGCTGCTTC  |
| Deltayhb <i>Vcat</i> .C   | TAAAGAGTAGTTAAAGTTGTTAACAAAGTGAGCTATTTAC<br>ATGGGAATTAGCCATGGTCC  |
| Deltar <i>lhAkan</i> .N   | GGCTAAAATAGCCGCCATTTTTTCAGCTACTGGATAAGAATGTGTAGGCT<br>GGAGCTGCTTC |
| Deltar <i>lhAkan</i> .C   | GCAGATTCAATAAGTTGTGAGTAACCAGAAAAGTGGCGTTATGGGAA<br>TTAGCCATGGTCC  |
| <i>yegQup</i> 100         | ATTGCCTCCGTTAAAGCCAATGG                                           |
| <i>yegQdown</i> 100       | AAATCCTTTTATTTTCATTGTATTACG                                       |
| <i>yhbUup</i> 77          | TTGTCGCAGCAAGGTTAACT                                              |
| <i>yhbUdown</i> 89        | GCTGGTGGCGGCCTGCTGAT                                              |
| <i>yhbVup</i> 100         | TTGTACCGCAAAGCGCGTGG                                              |
| <i>yhbVdown</i> 100       | GCAATGGTTTTATCAGTCAT                                              |
| <i>rlhAup</i> 100         | TTCCCTCATCCATTACCCGC                                              |
| <i>rlhAdown</i> 100       | CAACGTTGAGTCATTTGATG                                              |
| C1                        | TTATACGCAAGGCGACAAGG                                              |
| C2                        | GATCTTCCGTCACAGGTAGG                                              |
| C4                        | CGCCACATCTTGCGAATATATG                                            |
| K1                        | CAGTCATAGCCGAATAGCCT                                              |
| K2                        | CGGTGCCCTGAATGAACTGC                                              |

|                        |                                            |
|------------------------|--------------------------------------------|
| <i>yhbU</i> internal.N | TGCCGGAAATCTCCCGGCGC                       |
| <i>yhbU</i> internal.C | CGGTGATATGCGCCAAGAGT                       |
| <i>yhbV</i> internal.N | GGGCCAGTGCTGTGGTACTG                       |
| <i>yhbV</i> internal.C | AGCTCCAGTCCTGCCAGCCG                       |
| <i>yfhL</i> pBAD33.N   | GCCGGTACCATGGCGTTGTTAATCACTAAAAAATGC       |
| <i>yfhL</i> pBAD33.C   | GCCAAGCTTTTAAATTTTATCCGCGTGGTGCAT          |
| HisYfhL.N              | CATCATCACCACCATCACGCGTTGTTAATCACTAAAAAATGC |
| HisYfhL.C              | GTGGCGGCCGCTCTATTAATTTTATCCGCGTGGTGCAT     |
| HisYrrM.N              | CATCATCACCACCATCACACTGACCGGTATGAACAAATA    |
| HisYrrM.C              | GTGGCGGCCGCTCTATTACCTCTTCTTTTTACTAATCGC    |
| HisYrrN.N              | CATCATCACCACCATCACAAAAACCAGAGCTCTTAGTGACG  |
| HisYrrN.C              | GTGGCGGCCGCTCTATTAATAAACCGTTTCCTTGAAGAAGAA |
| HisYrrO.N              | CATCATCACCACCATCACACTGCCGTAAATGATAAAATATCC |
| HisYrrO.C              | GTGGCGGCCGCTCTATTACTTCCCCTTTCTCATCATGTTGCT |
| <i>yrrM</i> upstream   | AAAATATATCGGGTTGTTTACCGA                   |
| <i>yrrM</i> downstream | TGTTCCCCAACTAAAAACGCAGTT                   |
| <i>yrrN</i> upstream   | ATGAATATAATCATTGGCTGATGA                   |
| <i>yrrN</i> downstream | CAGGTGCGAGAAGCTCCGGCT                      |
| <i>yrrO</i> upstream   | CTGGATCGAACGCATTGAAAG                      |
| <i>yrrO</i> downstream | GTCCTTTAAACTGTTCATAAATGG                   |
| <i>erm</i> internal    | GTTGATCACGATAATTTCCAAGTT                   |
| YegQpLIKE.N            | GCCTCTAGATGTTTAAACCGGAACTCCTTTCC           |
| YegQpLIKE.C            | GCCAAGCTTTCACCTTACCGTGGGGATTACG            |
| YrrNpLIKE.N            | GCCTCTAGATGAAAAACCAGAGCTCTTAGTG            |
| YrrNpLIKE.C            | GCCCTGCAGTTAATAAACCGTTTCCTTGAA             |
| YrrOpLIKE.N            | GCCTCTAGATGACTGCCGTAAATGATAAAATATCC        |
| YrrOpLIKE.C            | GCCAAGCTTTTACTTCCCCTTTCTCATCAT             |
| pLIKErepseq.fwd        | GATTCGTTTTGCATATCTTCC                      |
| pLIKErepseq.rev        | GGAAAGCGGGCAGTGAGCGCA                      |
| BSPROBIOTIN            | 5'-TCCCAAACCATGTGCTCTACCAAGCT-BIOTIN       |

|             |                                            |
|-------------|--------------------------------------------|
| BSALABIOTIN | 5'-GTGCAAA GCAGG C GCTC TCCCAGCT-BIOTIN    |
| BSTHRBIOTIN | 5'-TTACAAG TCAGT T GCTC TACCAATT-BIOTIN    |
| BSVALBIOTIN | 5'-TTGTAAG GCAGA T GCTC TCCCAGCT-BIOTIN    |
| BSARGBIOTIN | 5'-TTAGAAG GCCGTTGCTC TATCCAGCT-BIOTIN     |
| BSSERBIOTIN | 5'-TTTCAAG ACCGA T CCCT TCAGCCAGACT-BIOTIN |

## Supplementary Figure Legends

**FIGURE S1.** PCR confirmation of *E. coli* *yegQ*<frt>, *yhbUV::cat*, *rlhA::kan* quadruple mutant construction. **A:** PCR analysis showing gene deletion or replacements (expected DNA size shown below lane). Lane M, MW markers; lane 1, mutant *yegQ* region with primers *yegQup100* + *yegQdown100*; lane 2, wt *yegQ* region with *yegQup100* + *yegQdown100*; lane 3, mutant *yhbUV* region with primers *yhbUup77* + *yhbVdown100*; lane 4 wt *yhbUV* region with *yhbUup77* + *yhbVdown100*; lane 5, mutant *rlhA* region with primers *rlhAup100* + *rlhAdown100*; lane 6, wt *rlhA* region with primers *rlhAup100* + *rlhAdown100*. **B:** PCR analysis of mutant showing accurate replacement of *yhbUV* with *cat* gene. Lane M, MW markers; lane 1, primer *yhbUup77* + internal *cat* primer C1; lane 2, primers *yhbVdown100* + internal *cat* primer C2; lane 3, primers *yhbUup77* + *yhbVdown100*; lane 4, wt strain with primers *yhbUup77* + *yhbVdown100*. **C:** PCR analysis of mutants with internal primers showing absence of peptidase U32 genes in genomic DNA. Lane M, MW markers; lane 1, mutant strain with HisYhbU primers; lane 2, wt with HisYhbU primers; lane 3, mutant with HisYhbV primers; lane 4, wt with HisYhbV primers; lane 5, mutant with HisRIhA primers; lane 6, wt with HisRIhA primers; lane 7 mutant with HisYegQ primers (wt with HisYegQ primers not shown).

**FIGURE S2.** Denaturing PAGE analysis of individual tRNAs purified from *B. subtilis* *yrrO* deletion strain BKK27340 (BGSC). Purified unmodified transcripts prepared using T7 RNA polymerase are shown for reference. Lane 1, AX-500 purified total tRNA; lane 2, purified

tRNA<sup>Ala</sup>(5GC); lane 3, tRNA<sup>Ala</sup>(5GC) T7 transcript; lane 4, tRNA<sup>Val</sup>(5AC); lane 5, tRNA<sup>Val</sup>(5AC) T7 transcript; lane 6, purified tRNA<sup>Thr</sup>(5GU); lane 7, tRNA<sup>Thr</sup>(5GU) T7 transcript; lane 8, purified tRNA<sup>Pro</sup>(5GG). (5 = mo<sup>5</sup>U)

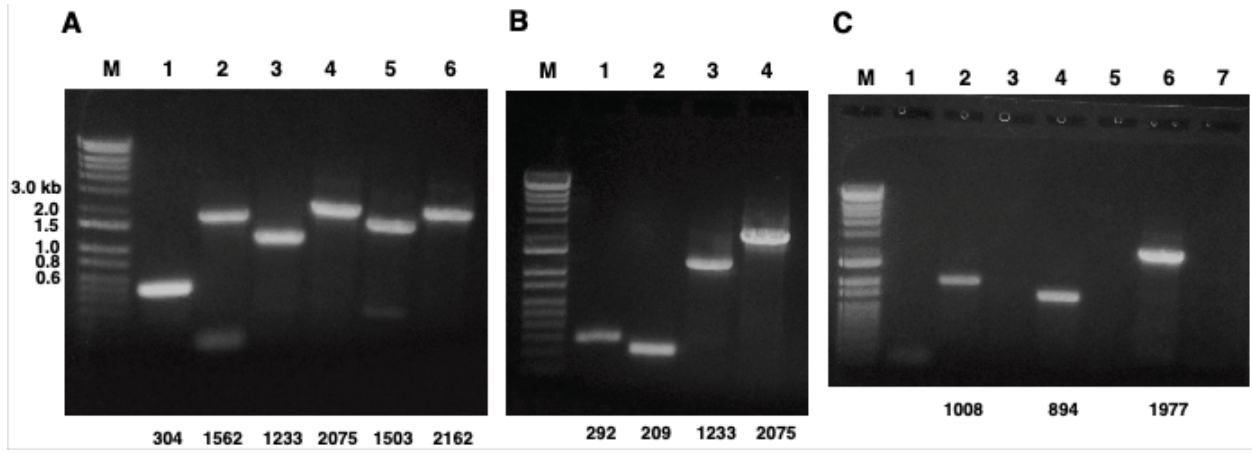

Figure S1

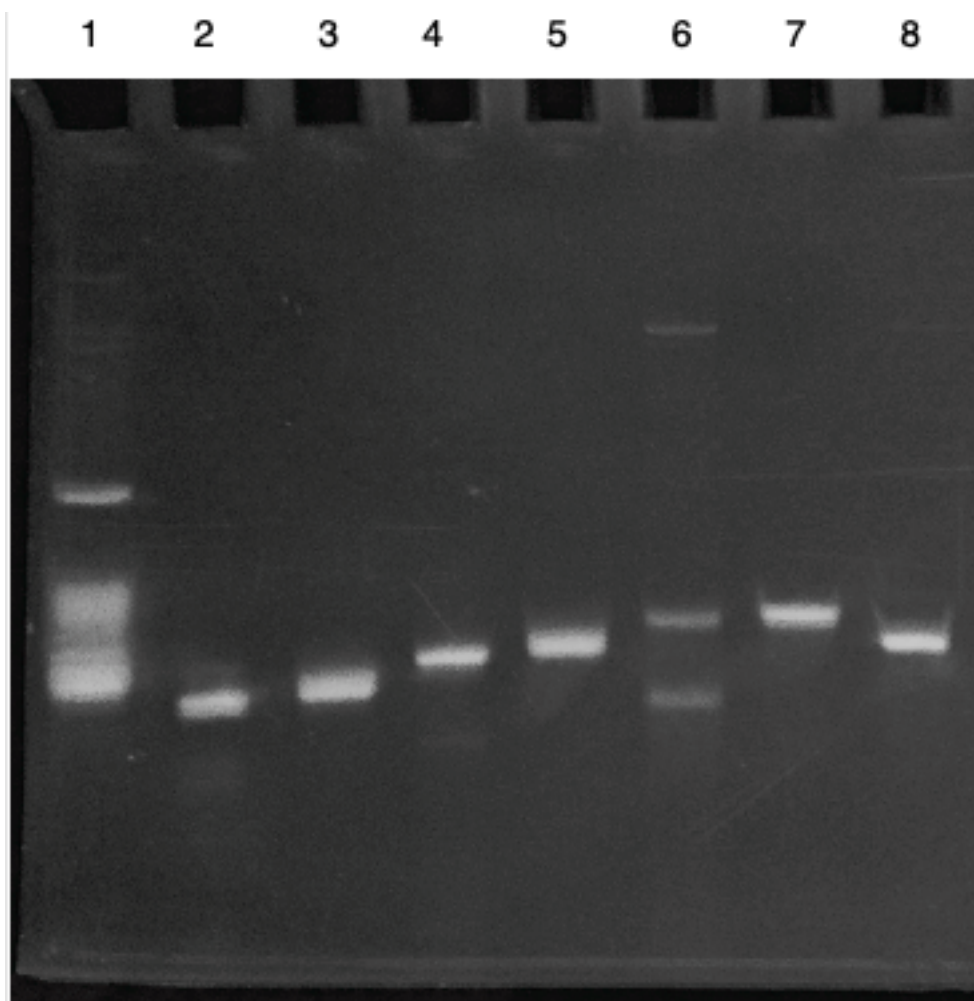

Figure S2
